# Supplementary material for: Fullerene rotation dictated by benzene–fullerene interactions
Source: Royal Society of Chemistry journal article supplement (doi:10.1039/d4qi00831f), 2024-01-01
Supplement: d4qi00831f1.pdf [file d4qi00831f1.pdf]

**Supporting information for**

**Fullerene rotation dictated by benzene-fullerene interactions**

Yaofeng Wang,<sup>b</sup> Fupin Liu<sup>a,b\*</sup>

a, Jiangsu Key Laboratory of New Power Batteries, School of Chemistry and Materials Science, Nanjing Normal University, Nanjing, 210023 China

b, Leibniz Institute for Solid State and Materials Research (IFW Dresden), Helmholtzstr. 20, 01069, Dresden, Germany

E-mail: liu\_fupin@nnu.edu.cn

**Contents**

|                                                                                                                               |          |
|-------------------------------------------------------------------------------------------------------------------------------|----------|
| <b>1. Crystal data</b> .....                                                                                                  | <b>2</b> |
| <b>2. Dy<sub>2</sub>ScN structure at 100 K</b> .....                                                                          | <b>3</b> |
| <b>3. Relations between two C<sub>80</sub> orientations at 180 K</b> .....                                                    | <b>3</b> |
| <b>4. The environment of Dy<sub>2</sub>ScN@C<sub>80</sub> and Lu<sub>3</sub>N@C<sub>80</sub> in the crystal lattice</b> ..... | <b>4</b> |
| <b>5. Packing of molecules in the crystal lattice</b> .....                                                                   | <b>5</b> |
| <b>6. Thermal ellipsoids of the nitrogen atom at variable temperatures</b> .....                                              | <b>5</b> |
| <b>7. Metal–Nitrogen bond lengths at high temperatures</b> .....                                                              | <b>6</b> |
| <b>8. Metal positions relative to NiOEP</b> .....                                                                             | <b>6</b> |

## 1. Crystal data

Table S1. Crystal data  $\text{Dy}_2\text{ScN@C}_{80}$ .

| Crystal                               | $\text{Dy}_2\text{ScN@C}_{80} \cdot \text{NiOEP} \cdot 2\text{C}_6\text{H}_6$ | $\text{Dy}_2\text{ScN@C}_{80} \cdot \text{NiOEP} \cdot 2\text{C}_6\text{H}_6$ | $\text{Dy}_2\text{ScN@C}_{80} \cdot \text{NiOEP} \cdot 2\text{C}_6\text{H}_6$ |
|---------------------------------------|-------------------------------------------------------------------------------|-------------------------------------------------------------------------------|-------------------------------------------------------------------------------|
| Formula                               | $\text{C}_{128}\text{H}_{56}\text{Dy}_2\text{ScN}_5\text{Ni}$                 | $\text{C}_{122}\text{H}_{50}\text{Dy}_2.07\text{N}_5\text{Ni}$                | $\text{C}_{122}\text{H}_{50}\text{Dy}_2.14\text{N}_5\text{Ni}$                |
| Formula weight                        | 2092.44                                                                       | 1980.55                                                                       | 1992.94                                                                       |
| Colour, habit                         | Black, block                                                                  | Black, block                                                                  | Black, block                                                                  |
| Crystal system                        | monoclinic                                                                    | monoclinic                                                                    | monoclinic                                                                    |
| Space group                           | $C2/c$                                                                        | $C2/c$                                                                        | $C2/c$                                                                        |
| $a$ , Å                               | 25.280(5)                                                                     | 25.300(5)                                                                     | 25.350(5)                                                                     |
| $b$ , Å                               | 15.030(3)                                                                     | 15.150(3)                                                                     | 15.250(3)                                                                     |
| $c$ , Å                               | 39.430(8)                                                                     | 39.590(8)                                                                     | 39.760(8)                                                                     |
| $\alpha$ , deg                        | 90                                                                            | 90                                                                            | 90                                                                            |
| $\beta$ , deg                         | 95.26(3)                                                                      | 95.28(3)                                                                      | 95.36(3)                                                                      |
| $\gamma$ , deg                        | 90                                                                            | 90                                                                            | 90                                                                            |
| Volume, Å <sup>3</sup>                | 14919(5)                                                                      | 15110(5)                                                                      | 15304(5)                                                                      |
| Z                                     | 8                                                                             | 8                                                                             | 8                                                                             |
| T, K                                  | 100                                                                           | 180                                                                           | 260                                                                           |
| Radiation ( $\lambda$ , Å)            | Synchrotron Radiation<br>(0.89429)                                            | Synchrotron Radiation<br>(0.89429)                                            | Synchrotron Radiation<br>(0.89429)                                            |
| Unique data<br>( $R_{int}$ )          | 15768 (0.0708)                                                                | 16195 (0.0704)                                                                | 16487 (0.0993)                                                                |
| Parameters                            | 1296                                                                          | 2002                                                                          | 2032                                                                          |
| Restraints                            | 1111                                                                          | 2634                                                                          | 2992                                                                          |
| Observed data<br>( $I > 2\sigma(I)$ ) | 13022                                                                         | 13762                                                                         | 13226                                                                         |
| $R_1^a$ (observed data)               | 0.0453                                                                        | 0.0695                                                                        | 0.1148                                                                        |
| $wR_2^b$ (all data)                   | 0.1229                                                                        | 0.3248                                                                        | 0.4344                                                                        |
| CCDC NO.                              | 2330927                                                                       | 2330928                                                                       | 2330929                                                                       |

$$R_1 = \frac{\sum ||F_o| - |F_c||}{\sum |F_o|} \quad . \quad wR_2 = \sqrt{\frac{\sum [w(F_o^2 - F_c^2)]^2}{\sum [w(F_o^2)]^2}}$$

<sup>a</sup>For data with  $I > 2\sigma(I)$ , <sup>b</sup>For all data,

## 2. Dy<sub>2</sub>ScN structure at 100 K

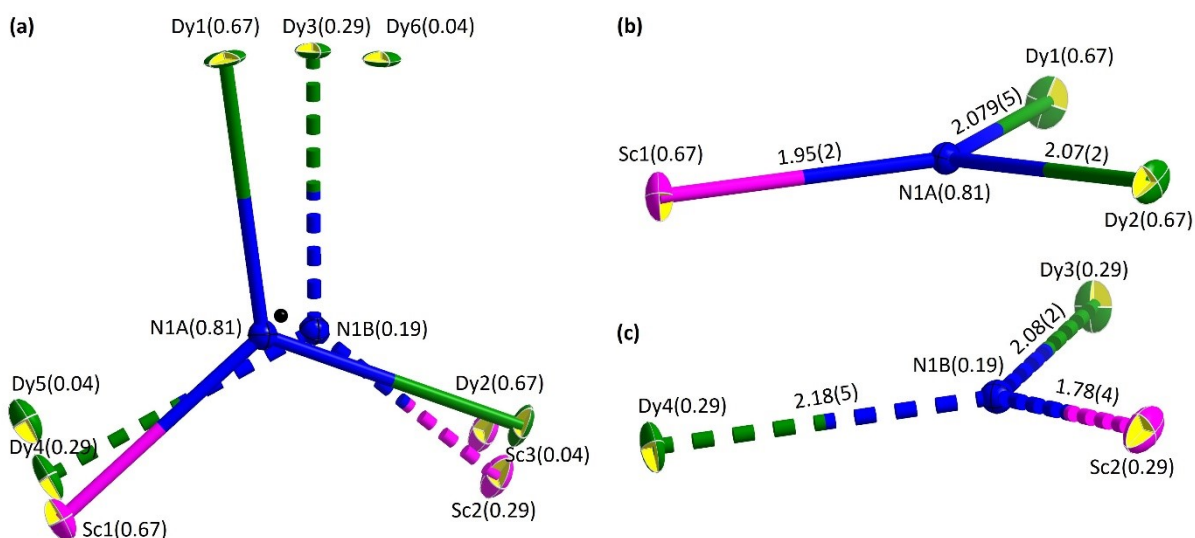

**Figure S1.** An overview of the Dy<sub>2</sub>ScN structure at 100 K is shown with the centroid of C<sub>80</sub> (black dot in the figure) to mark the displacement of N out of the C<sub>80</sub> centroid (a). The structure of Dy<sub>2</sub>ScN with the major/minor site occupancies is shown in b/c, respectively. The site occupancies with the atom labels and bond lengths (in Å) are shown in the figure. Colour code: blue for N, pink for Sc, and green for Dy. The thermal ellipsoids are set at 30% probability.

## 3. Relations between two C<sub>80</sub> orientations at 180 K

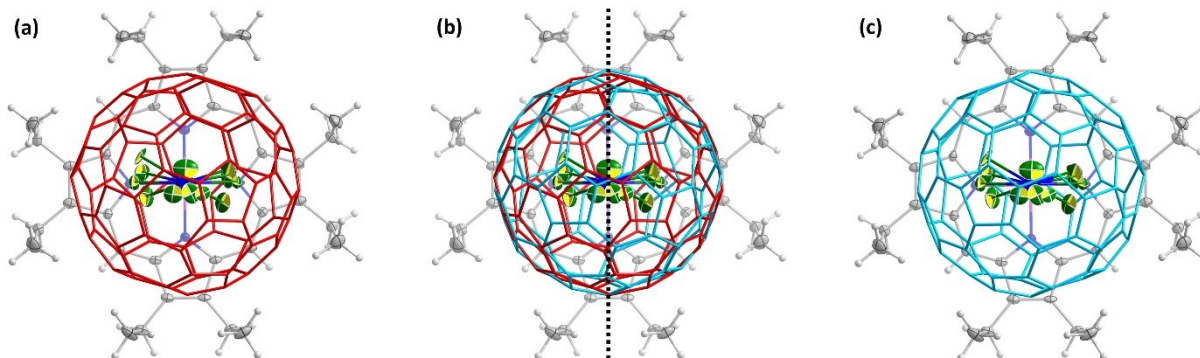

**Figure S2.** The two orientations (a and c) of C<sub>80</sub> at 180 K are correlated with a mirror symmetry (perpendicular to the paper and passing through the dotted line in b). Colour code: grey for C, white for H, blue for N, red for Ni, and green for Dy. The thermal ellipsoids are set at 30% probability except for the C<sub>80</sub>. The C<sub>80</sub> was highlighted with red/cyan to show the orientations.

#### 4. The environment of $\text{Dy}_2\text{ScN@C}_{80}$ and $\text{Lu}_3\text{N@C}_{80}$ in the crystal lattice

(a)  $\text{Dy}_2\text{ScN@C}_{80}$  in  $C2/c$ , 100 K

(b)  $\text{Lu}_3\text{N@C}_{80}$  in  $P\bar{1}$ , 100 K

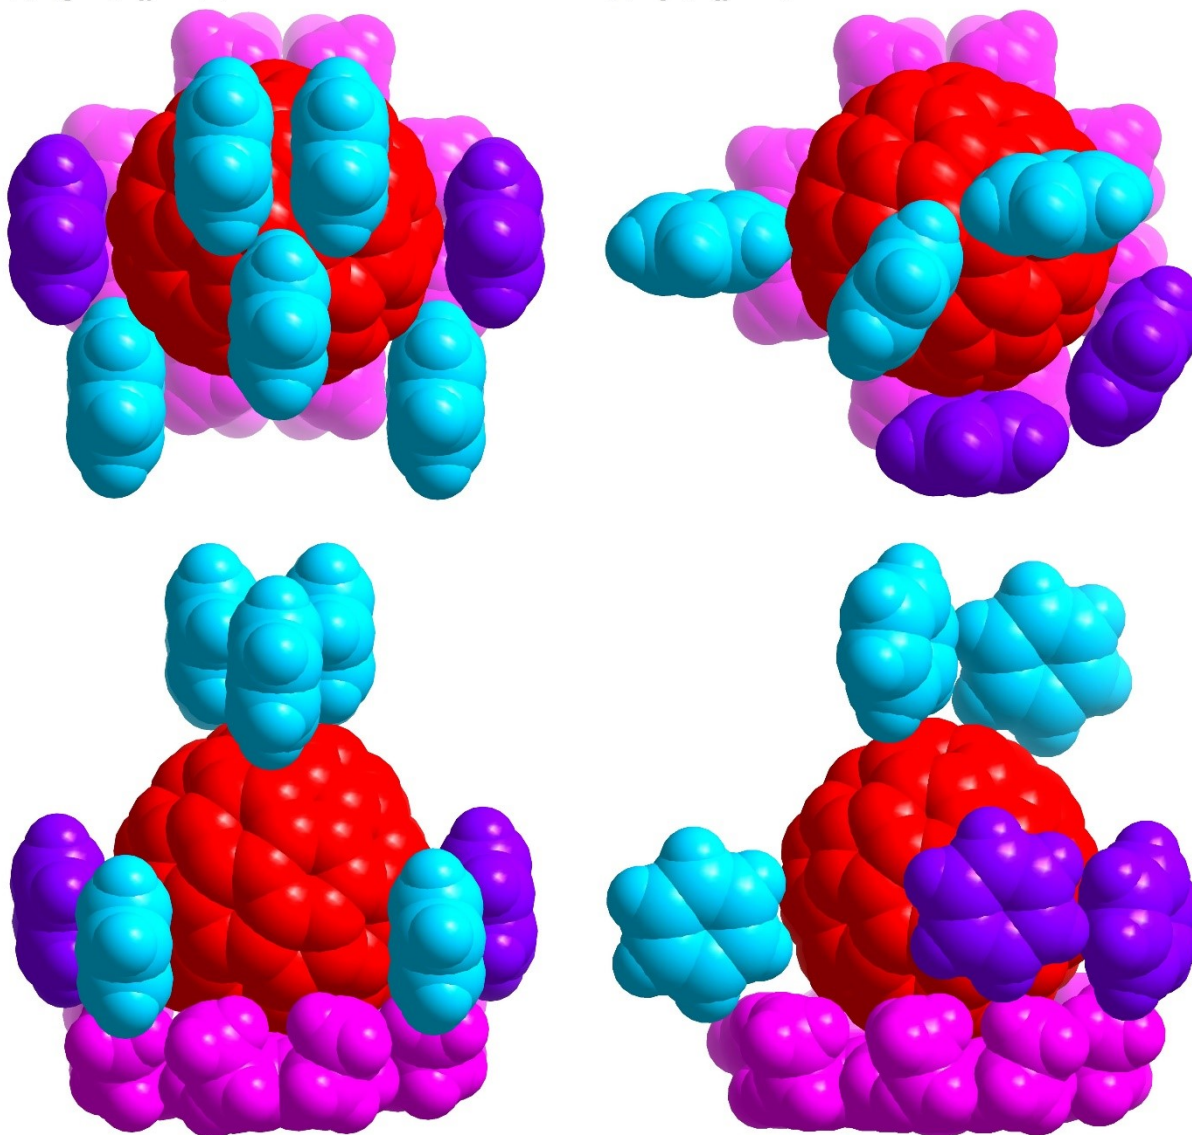

**Figure S3.** The space-filling structures of  $\text{Dy}_2\text{ScN@C}_{80}\cdot\text{NiOEP}\cdot 2\text{C}_6\text{H}_6$  in  $C2/c$  space group (a) and  $\text{Lu}_3\text{N@C}_{80}\cdot\text{NiOEP}\cdot 2\text{C}_6\text{H}_6$  in  $P\bar{1}$  space group (b, data from ref<sup>1</sup>) viewed perpendicular/parallel to the NiOEP plane, upper/lower panels, respectively, observed at 100 K. Colour code: red for fullerene cage, pink for NiOEP, purple for benzene molecules interacting with the fullerene cage through  $\pi$ - $\pi$  interaction, and cyan for benzene molecules interacting with the fullerene cage through C-H $\cdots\pi$  interaction.

## 5. Packing of molecules in the crystal lattice

(a) Dy<sub>2</sub>ScN@C<sub>80</sub> in C2/c

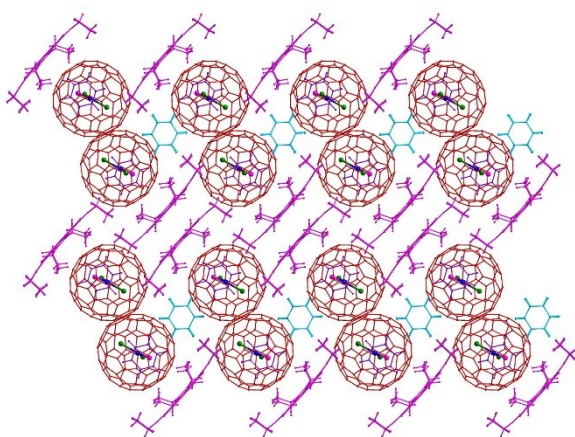

(b) Lu<sub>3</sub>N@C<sub>80</sub> in P $\bar{1}$

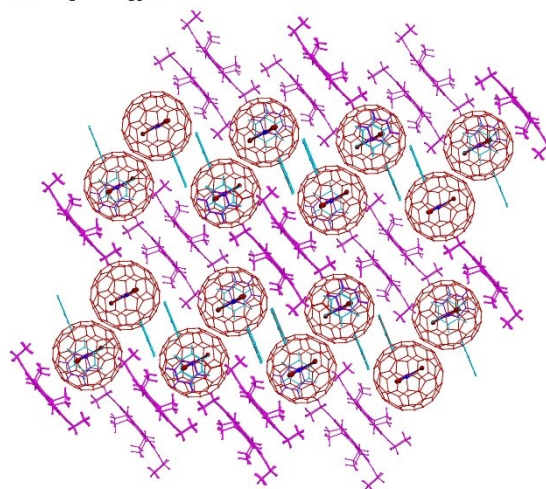

**Figure S4.** The molecular packings of Dy<sub>2</sub>ScN@C<sub>80</sub>·NiOEP·2C<sub>6</sub>H<sub>6</sub> in C2/c space group (a) and Lu<sub>3</sub>N@C<sub>80</sub>·NiOEP·2C<sub>6</sub>H<sub>6</sub> in P $\bar{1}$  space group (b; data from ref<sup>1</sup>) were shown for comparison. Colour code: red for the fullerene cage, pink for NiOEP, purple for benzene molecules interacting with the fullerene cage through π-π interaction, and cyan for benzene molecules interacting with the fullerene cage through C-H...π interaction.

## 6. Thermal ellipsoids of the nitrogen atom at variable temperatures

(a) 100 K

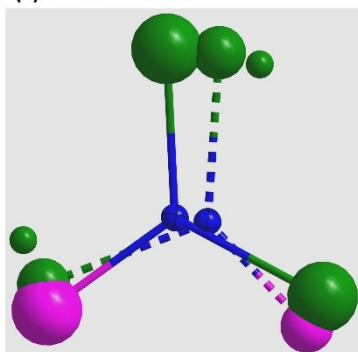

(b) 180 K

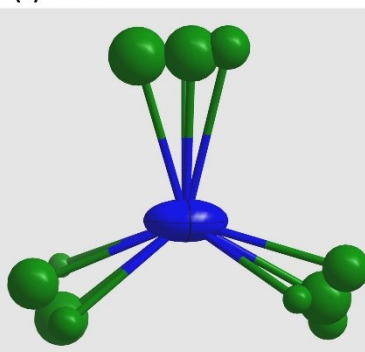

(c) 260 K

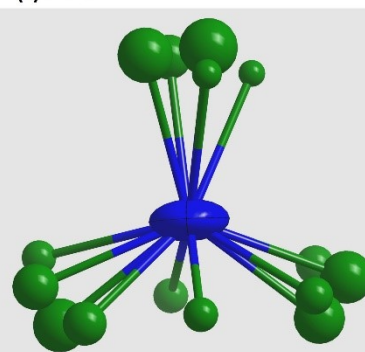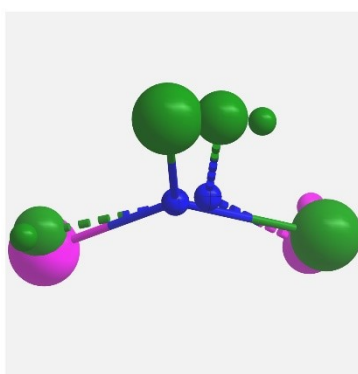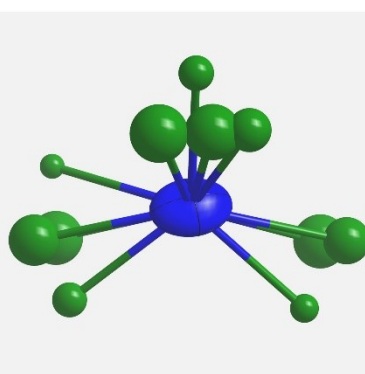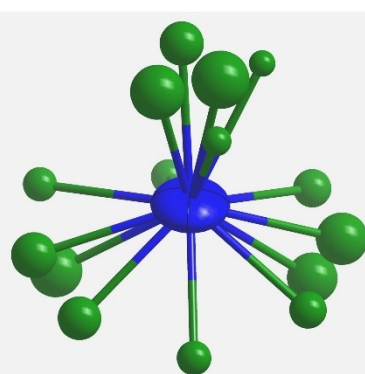

**Figure S5.** The Dy<sub>2</sub>ScN structures of Dy<sub>2</sub>ScN@C<sub>80</sub>·NiOEP·2C<sub>6</sub>H<sub>6</sub> observed at variable temperatures of (a) 100, (b) 180 and (c) 260 K. The structures were viewed from two directions (upper/lower panels) to show the thermal ellipsoids' shape clearly. The structures were shown with a metal volume equal to the site occupancy while the thermal ellipsoids of N are set at 70% probability. Colour code: blue for N, pink for Sc, and green for Dy.

## 7. Metal–Nitrogen bond lengths at high temperatures

Table S2. M–N bond lengths of Dy<sub>2</sub>ScN@C<sub>80</sub> at 180 and 260 K.

| Metal position (occupancy) at 180 K | M–N bond lengths (Å) at 180 K | Metal position (occupancy) at 260 K | M–N bond lengths (Å) at 260 K |
|-------------------------------------|-------------------------------|-------------------------------------|-------------------------------|
| Dy1 (0.10)                          | 2.07(2)                       | Dy1 (0.21)                          | 1.90(2)                       |
| Dy2 (0.23)                          | 1.963(7)                      | Dy2 (0.16)                          | 1.94(2)                       |
| Dy3 (0.18)                          | 1.983(7)                      | Dy3 (0.23)                          | 1.97(2)                       |
| Dy4 (0.15)                          | 2.153(9)                      | Dy4 (0.03)                          | 1.93(2)                       |
| Dy5 (0.27)                          | 1.949(6)                      | Dy5 (0.25)                          | 1.93(2)                       |
| Dy6 (0.04)                          | 1.85(2)                       | Dy6 (0.08)                          | 1.85(2)                       |
| Dy7 (0.34)                          | 2.052(5)                      | Dy7 (0.27)                          | 2.01(2)                       |
| Dy8 (0.03)                          | 1.95(2)                       | Dy8 (0.06)                          | 1.96(2)                       |
| Dy9 (0.07)                          | 1.900(8)                      | Dy9 (0.13)                          | 1.855(9)                      |
| Dy10 (0.27)                         | 1.873(8)                      | Dy10 (0.09)                         | 1.92(2)                       |
| Dy11 (0.08)                         | 2.008(6)                      | Dy11 (0.14)                         | 1.99(2)                       |
| Dy12 (0.30)                         | 2.014(5)                      | Dy12 (0.32)                         | 2.019(9)                      |
|                                     |                               | Dy13 (0.04)                         | 1.97(2)                       |
|                                     |                               | Dy14 (0.07)                         | 1.88(1)                       |
|                                     |                               | Dy15 (0.07)                         | 1.91(2)                       |

## 8. Metal positions relative to NiOEP

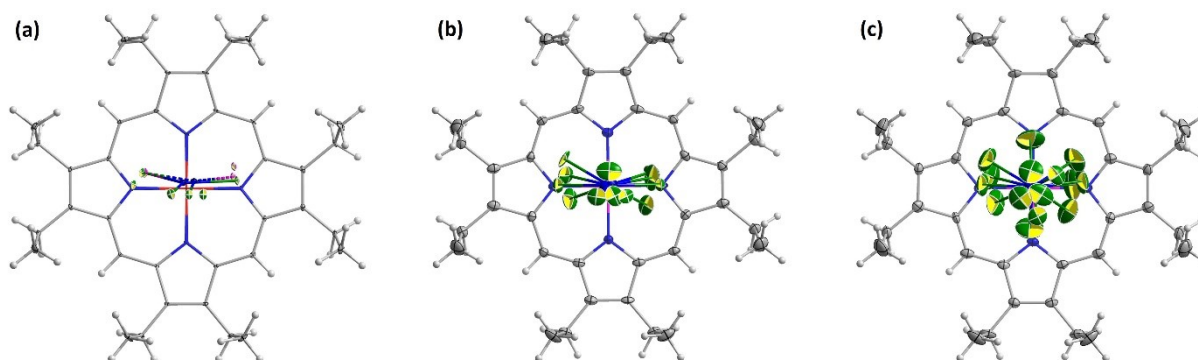

**Figure S6.** The structures of Dy<sub>2</sub>ScN@C<sub>80</sub>·NiOEP·2C<sub>6</sub>H<sub>6</sub> (a: 100 K, b: 180 K, c: 260 K) are viewed perpendicular to the NiOEP plane. The structures are shown without C<sub>80</sub> and benzenes for clarity to highlight the metal positions. Colour code: grey for C, white for H, blue for N, red for Ni, pink for Sc, and green for Dy. The thermal ellipsoids are set at 30% probability.

### References:

1. F. Liu and L. Spree, Molecular spinning top: visualizing the dynamics of M<sub>3</sub>N@C<sub>80</sub> with variable temperature single crystal X-ray diffraction, *Chem. Commun.*, 2019, **55**, 13000-13003.
